# Supplementary material for: Synthesis, characterisation and biological properties of gold(iii) compounds with modified bipyridine and bipyridylamine ligands
Source: Royal Society of Chemistry journal article supplement (doi:10.1039/b921019a), 2010-01-01

## Supplementary Information Available

### *Synthesis, characterization and biological properties of gold(III) compounds with substitute bipyridine and bipyridylamine ligands*

Angela Casini, Mariam Celine Diawara, Rosario Scopelliti, Shaik Mohammed Zakeeruddin,  
Michael Grätzel and Paul J. Dyson

*Institut des Sciences et Ingénierie Chimiques, Ecole Polytechnique Fédérale de Lausanne (EPFL),  
CH-1015 Lausanne, Switzerland.*

**Figure S1.** UV-visible spectra of **5** ( $10^{-4}$  M) in PBS (pH 7.4) recorded at different times over 6 hours incubation at 37 °C.

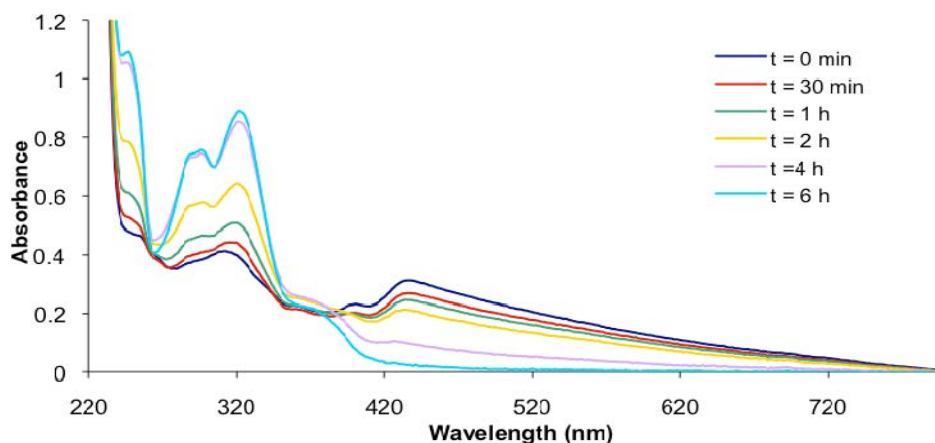

**Figure S2.** UV-visible spectra of **2** ( $10^{-4}$  M) in PBS (pH 7.4) with increasing amounts of glutathione (GSH).

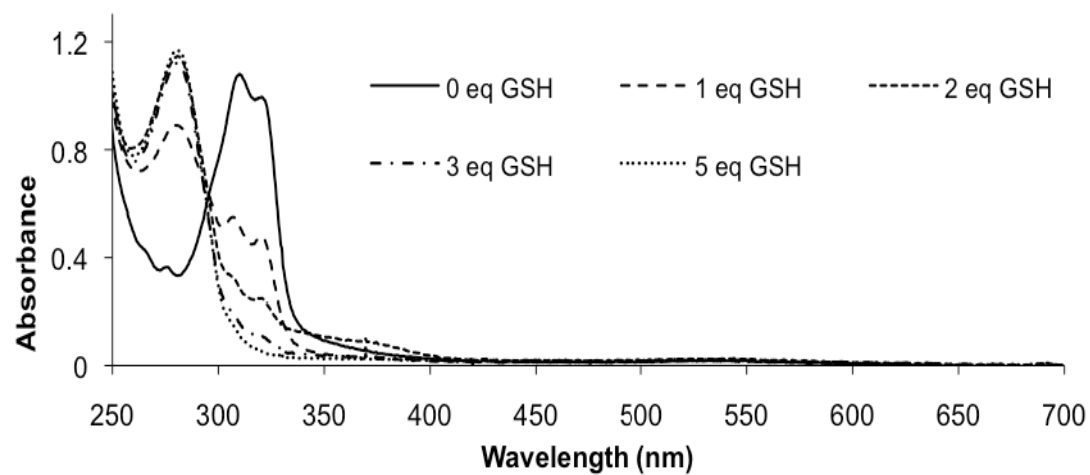

Supplement: b921019a.pdf [file b921019a.pdf]
